# Supplementary material for: A Comparison of Adult Mosquito Trapping Methods to Assess Potential West Nile Virus Mosquito Vectors in Greece during the Onset of the 2018 Transmission Season
Source: PubMed Central journal article supplement (PMC7348707; doi:10.3390/insects11060329), 2020-05-27
Supplement: insects-11-00329-s001.pdf [file insects-11-00329-s001.pdf]

**Table S1.** Geographical locations with GPS co-ordinates of mosquito trapping sites within the Attica and Peloponnese regions of Greece.

| Region/Regional Unit  | Sampling location<br>(Local name/Description) | Trapping Site<br>(Street Name or Description) | GPS Co-ordinates<br>(Decimal Degrees) |            |
|-----------------------|-----------------------------------------------|-----------------------------------------------|---------------------------------------|------------|
|                       |                                               |                                               | Latitude                              | Longitude  |
| Attica/Palaio Faliro  | Rema Pikrodafnis                              | Aristeidou str.                               | 37.923972                             | 23.710106  |
|                       |                                               | Dimokritou str.                               | 37.923836                             | 23.711511  |
|                       |                                               | Sofokleous str.                               | 37.922997                             | 23.710306  |
|                       | Dimarchio                                     | Terpsichoris str.                             | 37.928111                             | 23.699008  |
|                       |                                               | Naiadon str.                                  | 37.927989                             | 23.696631  |
|                       |                                               | Athanasiadou str.                             | 37.928819                             | 23.698006  |
|                       | KAPI                                          | Seirionon str.                                | 37.931997                             | 23.692625  |
|                       |                                               | Esperou str.                                  | 37.931228                             | 23.692983  |
|                       |                                               | Atlantos str.                                 | 37.931408                             | 23.692219  |
|                       | Agia Triada                                   | Veterinary clinic                             | 37.636256                             | 22.798003  |
|                       |                                               | Juice factory                                 | 37.6439366                            | 22.7883761 |
|                       |                                               | Private house                                 | 37.638997                             | 22.805275  |
| Guard room (prisons)  |                                               | 37.596544                                     | 22.799989                             |            |
| Sheep area (prisons)  |                                               | 37.594242                                     | 22.796617                             |            |
| Peloponnese/ Argolida | Nea Tirintha                                  | Cattle area (prisons)                         | 37.592711                             | 22.797669  |
|                       |                                               | Horse area                                    | 37.611461                             | 22.739725  |
|                       |                                               | Dalamanara                                    | Private house 1                       | 37.620261  |
|                       | Private house 2                               | 37.612106                                     | 22.738719                             |            |
